# Supplementary material for: Effects of osteoblast-derived extracellular vesicles on aggressiveness, redox status and mitochondrial bioenergetics of MNNG/HOS osteosarcoma cells
Source: PubMed Central journal article supplement (PMC9762506; doi:10.3389/fonc.2022.983254), 2022-12-05
Supplement: DataSheet_1.pdf [file DataSheet_1.pdf]

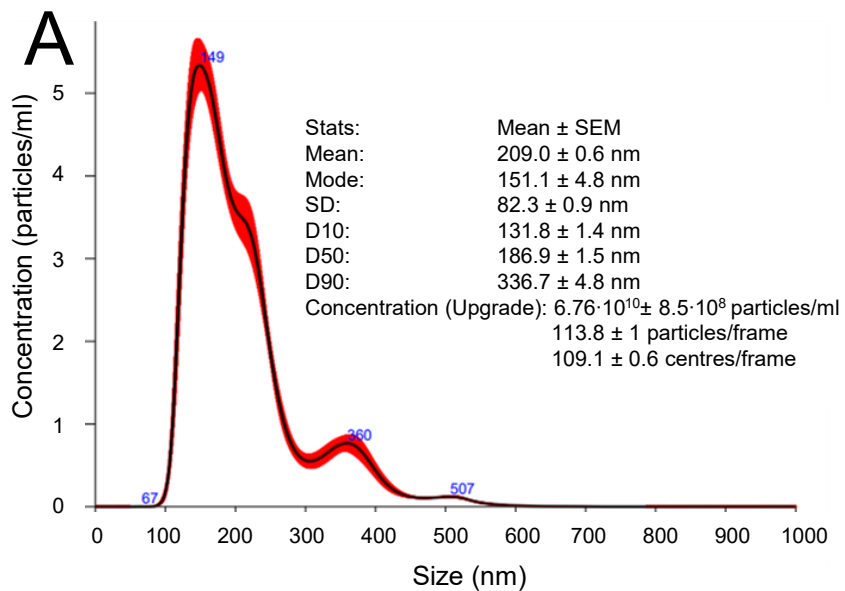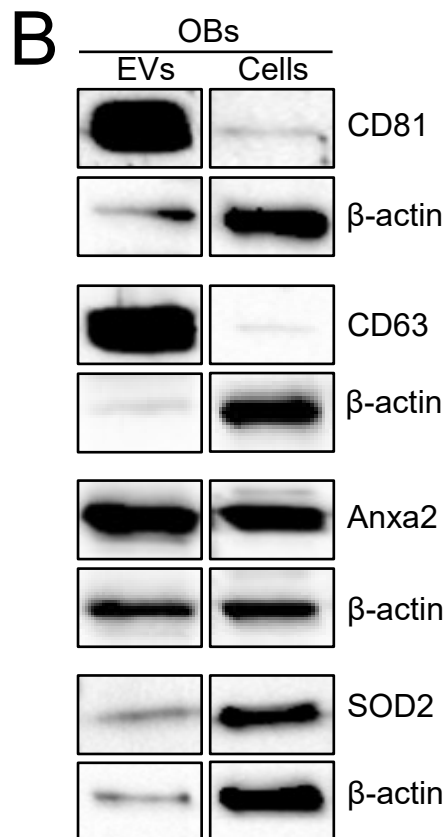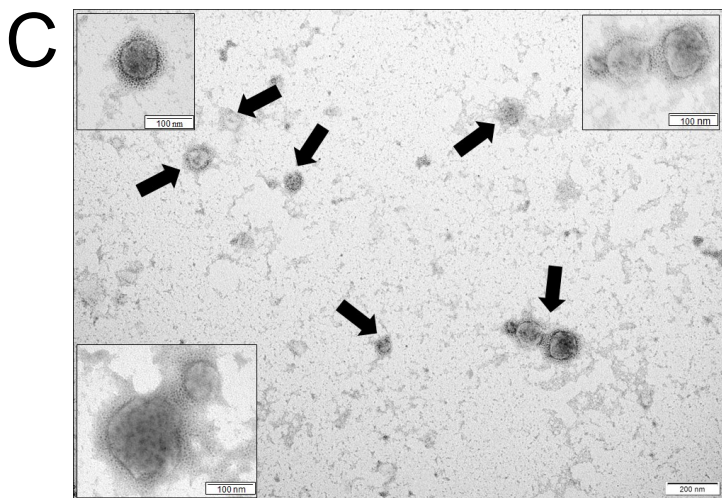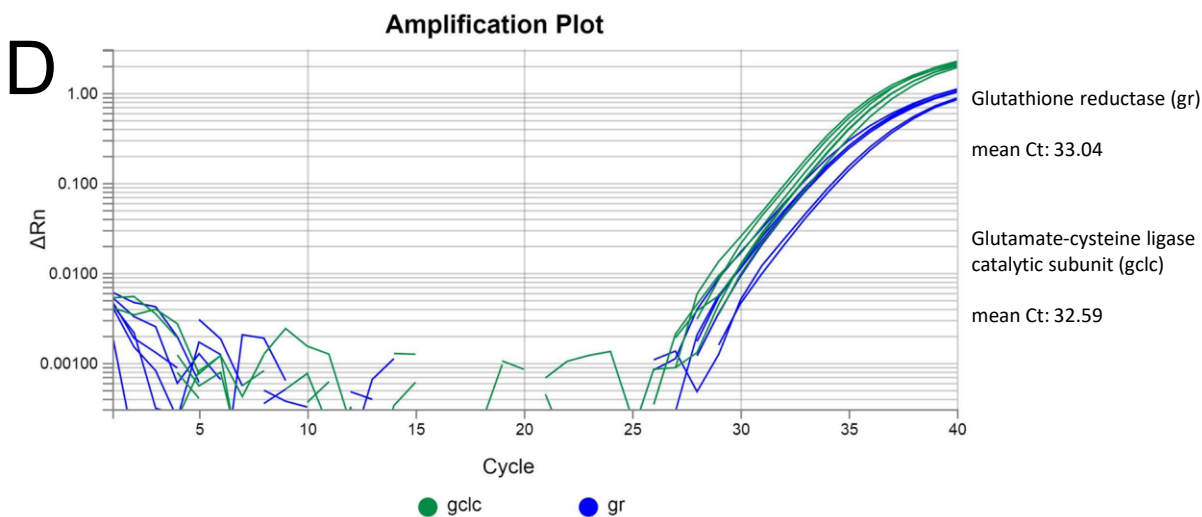

## SUPPLEMENTAL MATERIAL

**Supplementary Figure 1. Characterisation of osteoblast-derived EVs.** Mouse primary osteoblasts were starved in serum-free DMEM for 24 hours and EVs were isolated from their conditioned medium (CM) by ultracentrifugation. **(A)** Size and concentration determination of OB-EVs (isolated from 12 ml of CM collected from one 175 cm<sup>2</sup> flask, cell density = 3.5x10<sup>4</sup> cells/cm<sup>2</sup>) by nanoparticle tracking analysis (NanoSight NS300). **(B)** Western blot for the EV positive markers CD81, CD63, Annexin II (Anxa2), for the negative marker SOD2 and for  $\beta$ -Actin as loading control in protein lysates (8 $\mu$ g) extracted from osteoblasts (OBs) and osteoblast-derived EVs (OB-EVs). **(C)** Transmission Electron Microscopy (TEM) evaluation of OB-EVs (arrows), original magnification 34000x; insets: higher magnification (92000x) in different fields of the same EVs sample. Data are representative of 3 independent preparations. **(D)** TaqMan-based real time RT-PCR amplification plot of glutathione reductase (gr) and glutamate-cysteine ligase catalytic subunit (gclc) transcripts in total RNA isolated from OB-EVs. Data are from 2 independent preparations.

**Supplementary Table I: Antibodies and dilutions used for Western blot analyses.**

| Target         | Manufacturer                  | Catalogue # | RRID#      | Working dilution |
|----------------|-------------------------------|-------------|------------|------------------|
| $\beta$ -actin | Santa Cruz<br>Biotechnologies | sc-81178    | AB_2223230 | 1:1000           |
| Annexin II     | Santa Cruz<br>Biotechnologies | sc-9061     | AB_2057340 | 1:200            |

|                                              |                                |           |            |        |
|----------------------------------------------|--------------------------------|-----------|------------|--------|
| CD81                                         | Santa Cruz<br>Biotechnologies  | sc-166029 | AB_2275892 | 1:400  |
| CD63                                         | Thermo Fisher<br>Scientific    | PA5-92370 | AB_2806456 | 1:500  |
| CAT                                          | Abcam                          | ab16731   | AB_302482  | 1:2000 |
| SOD2                                         | Abcam                          | ab86087   | AB_2191662 | 1:1000 |
| p53                                          | Cell signaling<br>technologies | 48818S    | AB_2713958 | 1:1000 |
| MFN1/2                                       | Abcam                          | ab57602   | AB_2142624 | 1:750  |
| PGC1 $\alpha$                                | Santa Cruz<br>Biotechnologies  | sc-518025 | AB_2890187 | 1:200  |
| $\alpha$ -tubulin                            | Sigma Aldrich                  | T5168     | AB_477579  | 1:4000 |
| <b>Secondary antibodies (HRP conjugated)</b> |                                |           |            |        |
| Goat anti-mouse<br>IgG                       | Thermo Fisher<br>Scientific    | 31430     | AB_228307  | 1:5000 |
| Mouse anti-<br>rabbit IgG                    | Santa Cruz<br>Biotechnologies  | sc-2357   | AB_628497  | 1:5000 |

**Abbreviations:** CAT, catalase; MFN1/2, mitofusin 1/2; PGC1 $\alpha$ , Peroxisome proliferator-activated receptor gamma coactivator 1-alpha; SOD2, superoxide dismutase 2.
